# Supplementary material for: Pain and Communication in Children with Cerebral Palsy: Influence on Parents’ Perception of Family Impact and Healthcare Satisfaction
Source: PubMed Central journal article supplement (PMC7912482; doi:10.3390/children8020087), 2021-01-27

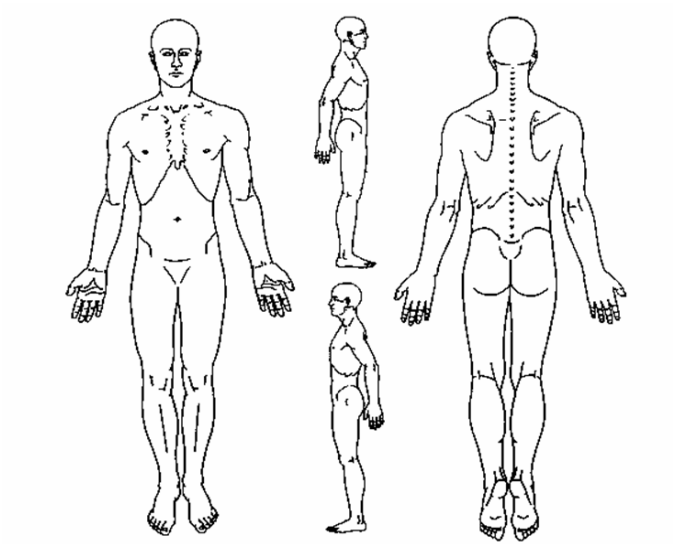

Supplement: children-08-00087-s001.pdf [file children-08-00087-s001.pdf]
